# Supplementary material for: Chemotherapy plus Involved-Field Radiation in Early-Stage Hodgkin's Disease
Source: Atypon-hosted journal article supplement (doi:10.1056/nejmoa064601), 2007-11-07
Supplement: nejm_ferme_1916sa1.pdf [file nejm_ferme_1916sa1.pdf]

## Supplementary Appendix

This appendix has been provided by the authors to give readers additional information about their work.

Supplement to: Fermé C, Eghbali H, Meerwaldt JH, et al. Chemotherapy plus involved-field radiation in early-stage Hodgkin's disease. *N Engl J Med* 2007;357:1916-27.

**Administrative support:** Comprehensive Cancer Center François Baclesse, Caen, France

**Provision of study materials or patients:** Christophe Fermé, Houchingue Eghbali, Jacobus H. Meerwaldt, Jacques Bosq, Françoise Berger, Théodore Girinsky, Pauline Brice, Mars B. van't Veer, Jan A. Walewski, Pierre Lederlin, Umberto Tirelli, Patrice Carde, Eric Van Den Neste, Emmanuel Gyan, Mathieu Monconduit, Marine Diviné, John M. M. Raemaekers, Gilles Salles, Ed M. Noordijk, Geert-Jan Creemers, Jean Gabarre, Anton Hagenbeek, Oumédaly Reman, Michel Blanc, José Thomas, Brigitte Vié, Johanna C. Kluin-Nelemans, Fernando Viseu, Joke W. Baars, Philip Poortmans, Pieternella J. Lugtenburg, Christian Carrie and Jérôme Jaubert

**Collection and assembly of data:** Chantal Rieux and Michel Henry-Amar

**Data analysis and interpretation:** Christophe Fermé, Houchingue Eghbali, Jacobus H. Meerwaldt and Michel Henry-Amar

**Manuscript writing:** Christophe Fermé, Houchingue Eghbali and Michel Henry-Amar

**Final approval of manuscript:** Christophe Fermé, Houchingue Eghbali, Jacobus H. Meerwaldt, Chantal Rieux, Jacques Bosq, Françoise Berger, Théodore Girinsky, Pauline Brice, Mars B. van't Veer, Jan A. Walewski, Pierre Lederlin, Umberto Tirelli, Patrice Carde, Eric Van Den Neste, Emmanuel Gyan, Mathieu Monconduit, Marine Diviné, John M. M. Raemaekers, Gilles Salles, Ed M. Noordijk, Geert-Jan Creemers, Jean Gabarre, Anton Hagenbeek, Oumédaly Reman, Michel Blanc, José Thomas, Brigitte Vié, Johanna C. Kluin-Nelemans, Fernando Viseu, Joke W. Baars, Philip Poortmans, Pieternella J. Lugtenburg, Christian Carrie, Jérôme Jaubert and Michel Henry-Amar

The following investigators participated in the study: *Algemeen ziekenhuis Middelheim, Antwerp, Belgium* – R. de Bock and A. Boumans; *University Hospital St. Jan, Brugge, Belgium* – A. van Hoof; *Cliniques Universitaires Saint-*

*Luc, Brussels, Belgium – E. van den Neste; Institut Jules Bordet, Brussels, Belgium – D. Bron; University Hospital Saint Pierre, Brussels, Belgium – A. Efir; University Hospital Antwerp, Edegem, Belgium – W. Schroyens; University Hospital Tivoli, La Louvière, Belgium – J. Michel; University Hospital Gasthuisberg, Leuven, Belgium – J. Thomas and G. Verhoef; University Hospital St-Rafael, Leuven, Belgium – M. Beckers and Y. Lievens; Clinique Saint Pierre, Ottignie, Belgium – M. Maerevoet; Clinique de Mont-Godinne, Yvoir, Belgium – A. Bosly and C. Doyen; Centre Hospitalier, Annecy, France – C. Martin; Centre Hospitalier Général, Bayonne, France – F. Bauduer; Centre Hospitalier Universitaire Jean Minjoz, Besançon, France – L. Voillat; Centre Hospitalier Général Montmaran, Béziers, France – S. David; Institut Bergonié, Bordeaux, France – H. Eghbali, B. Hoerni, P. Richaud and P. Soubeyran; Groupe Hospitalier Sud, Pessac, France – G. Marit; C.C.C. François Baclesse, Caen, France – M. Henry-Amar, A-M. Pény, C. Rieux, A. Tanguy and B. Vié; Centre Hospitalier Universitaire G. Clémenceau, Caen, France – O. Reman; Centre Hospitalier Universitaire, Chambéry, France – M. Blanc; Centre d'Oncologie et de Radiothérapie, Chaumont, France – G. Dupont; Hôpital André Mignot, Le Chesnay, France – S. Castaigne; Centre Hospitalier Universitaire Antoine Béclère, Clamart, France – F. Boué; Centre Hospitalier Général Louis-Pasteur, Colmar, France – B. Audhuy; Centre Hospitalier Général, Compiègne, France – D. Zylberait; Hôpital Gilles de Corbeil, Corbeil-Essonnes, France – A. Devidas; Centre Hospitalier Universitaire Henri-Mondor, Créteil, France – C. Balmale, A. Dessaints, M. Diviné, C. Haioun, N. Nio, F. Reyes<sup>‡</sup> and A. Salis; C.C.C. Georges-François Leclerc, Dijon, France – P. Fargeot and P. Maingon; Centre Hospitalier Universitaire, Dijon, France – D. Caillot, R.O. Casasnovas; Centre Hospitalier Universitaire, Le Kremlin-Bicêtre, France – G. Tertian; Centre Hospitalier Général, Lens, France – B. Dupriez and P. Morel; Centre Hospitalier Universitaire Dupuytren, Limoges, France – D. Bordessoule; C.C.C. Léon Bérard, Lyon, France – C. Carrie, T. Gargi and C. Sebban; Centre Hospitalier Universitaire Edouard-Herriot, Lyon, France – V. Lhéritier and Troncy; Centre Hospitalier Universitaire Lyon-Sud, Pierre-Bénite, France – S. Baulu, B. Coiffier,*

D. Espinouse, G. Salles and C. Thieblemont; *Clinique Victor-Hugo, Le Mans, France* – P. Solal-Céligny; *C.C.C. Paoli-Calmette, Marseille, France* – R. Bouabdallah and A-M. Stoppa; *Centre Hospitalier Universitaire Nord, Marseille, France* – G. Sebahoun; *Centre Hospitalier Bon-Secours, Metz, France* – B. Christian; *Centre Hospitalier, Montfermeil, France* – M. Echard; *Centre Hospitalier Universitaire Saint-Eloy, Montpellier, France* – P. Quittet; *Centre Hospitalier Général, Mulhouse, France* – J.C. Eisenmann; *C.C.C. Alexis Vautrin, Vandoeuvre-les-Nancy, France* – T. Conroy and S. Hoffstetter; *Centre Hospitalier Universitaire Brabois, Nancy, France* – P. Lederlin; *C.C.C. Antoine Lacassagne, Nice, France* - J. Bof, J-L. Lagrange, M. Schneider and A. Thyss; *Centre Hospitalier Général, Orléans, France* –R. Leloup and G.L. Vaugier; *Centre Hospitalier Universitaire Cochin, Paris, France* – F. Dreyfus and E. Gyan; *Centre Hospitalier Universitaire Lariboisière, Paris, France* – J-M. Zini; *Centre Hospitalier Universitaire Necker, Paris, France* – C. Bellanger; *Centre Hospitalier Universitaire Pitié-Salpêtrière, Paris, France* – J. Gabarre; *Centre Hospitalier Universitaire Saint-Antoine, Paris, France* – M. Aoudjhane; *Centre Hospitalier Universitaire Saint-Louis, Paris, France* – P. Brice, C. Gisselbrecht, P. Godard, C. Hennequin and M. Storez; *Centre Hospitalier Inter-communal, Poissy, France* – C. Collet; *Centre Hospitalier René Dubos, Pontoise, France* – Y.J.P. Kerneis; *Institut Jean Godinot, Reims, France* – V. Dupuis and D. Froissart; *Centre Henri Becquerel, Rouen, France* – M. Monconduit, A. Stamatoullas and H. Tilly; *Centre Hospitalier Général, Saint-Brieuc, France* – P. Morice ; *C.C.C. René Huguenin, Saint-Cloud, France* – M. Janvier; *Centre Hospitalier Universitaire, Saint-Etienne, France* – J. Jaubert; *Centre Hospitalier, Saint-Germain-en-Laye, France* – M. Azagury; *Centre Médico-Chirurgical Foch, Suresnes, France* - E. Baumelou; *Hôpital Inter-Armées Sainte-Anne, Toulon, France* – F. Jaubert; *Centre Hospitalier Général, Valenciennes, France* – M. Simon; *Institut de cancérologie Gustave Roussy, Villejuif, France* – P. Carde, C. Fermé, T. Girinsky and V. Ribrag; *Medisch Centrum, Alkmaar, the Netherlands* – L.H.S. van Heukelen; *Flevo Hospital, Almere, the Netherlands* – V.D. Vall; *the Netherlands Cancer Institute, Amsterdam, the Netherlands* – J.W. Baars, R. Haas and L. Valkener;

*Academisch Medisch Centrum, Amsterdam, the Netherlands* – B. Odijk and M.H.J. van Oers; *Onze Lieve Vrouwe Gasthuis, Amsterdam, the Netherlands* – A.M. Naber and K.J. Rozendaal; *Hospital Gooi-Noord, Blaricum, the Netherlands* – H.P. Muller; *St. Ignatius Hospital, Breda, the Netherlands* – A.C.J.M. Holdrinet and P. Poortmans; *Hospital Gregorius, Brunssum, the Netherlands* – J. Wals; *Catharina Hospital, Eindhoven, the Netherlands* – W.P.M. Breed, G-J. Creemers, M. Lybeert and W.G. Peters; *Medisch Spectrum Twente, Enschede, the Netherlands* – M. van Leeuwen, J.H. Meerwaldt and M.R. Schaafsma; *Hospital Leyenburg, Den Haag, the Netherlands* – P. Wijermans; *Hospital De Wever, Heerlen, the Netherlands* – M. Fickers; *Bosch Medicentrum, Hertogenbosch, the Netherlands* – H.A.M. Sinnige; *Radiotherapeutisch Instituut Friesland, Leeuwarden, the Netherlands* – K.J. van den Elsaher and W.G.J.M. Smit; *Integral Cancer Centrum, Leiden, the Netherlands* – W. B. J. Gerrits, J.C. Kluin-Nelemans and E.M. Noordijk; *University Hospital, Maastricht, the Netherlands* – M. van Kleef and H.C. Schouten; *Radboud University Medical Centre Nijmegen, Nijmegen, the Netherlands* – A. Hulshoff, R. van der Maazen and J.M.M. Raemaekers; *Daniel den Hoed Cancer Center, Rotterdam, the Netherlands* – A.D.G. Krol and M.B. van't Veer; *Erasmus MC University Medical Center Rotterdam, Rotterdam, the Netherlands* - P.J. Lugtenburg and M. Olofsen; *Hospital Maasland, Sittard, the Netherlands* – H.N.L.M. Bron; *University Medical Centre Utrecht, Utrecht, the Netherlands* – A. Hagenbeek and M.L. van Kempen-Harteveld; *Sophia Hospital, Zwolle, the Netherlands* – D. Boon and M. van Marwijk Kooy; *Centro di Riferimento Oncologico, Aviano, Italy* – A. Pinto, M. Rupolo, M. Spina and U. Tirelli; *Ospedale Santa Maria Delle Croci, Ravenna, Italy* – G. Rosti and B. Vertogen; *Ospedale San Giovanni, Torino, Italy* – R. Musella; *Centre of Oncology-Maria Sklodowska-Curie Memorial Institute, Warsaw, Poland* – B. Brzeska, F. Lampka, J. Meder, W. Osiadacz, J. Tajer, J.A. Walewski and J. Zwolinski; *Instituto Portugues de Oncologia, Porto, Portugal* – A. Oliveira and F. Viseu; *Institute of Oncology, Ljubljana, Slovenia* – R. Tomsic; *Hospital Universitario "12 de Octubre," Madrid, Spain* – A. Paz-Ares.

The following were members of the pathology-review committee: *C.C.C. François Baclesse, Caen, France* – A-M. Mandard and J. Marnay (data manager); *Institut de cancérologie Gustave Roussy, Villejuif, France* – J. Bosq; *Hôpital Hôtel-Dieu, Paris, France* – J. Audouin and J. Diébold; *the Netherlands Cancer Institute, Amsterdam, the Netherlands* – D. de Jong; *St. James University Hospital, Leeds, United Kingdom* – K.A. MacLennan, for the European Organization for Research and Treatment of Cancer Lymphoma Group; *Hospices Civils de Lyon, Université Lyon1, France* – F. Berger; *Centre Hospitalier Universitaire Henri-Mondor, Créteil, France* – P. Gaulard, for the Groupe d'Études des Lymphomes de l'Adulte.

The following were members of the radiotherapy quality control committee: *Institut de cancérologie Gustave Roussy, Villejuif, France* – T. Girinsky; *C.C.C. Léon Bérard, Lyon, France* – C. Carrie; *Institut Curie, Paris, France* – J-M. Cosset; *Centre Hospitalier Universitaire Saint-Louis, Paris, France* – C. Hennequin; *C.C.C. Alexis Vautrin, Vandoeuvre-les-Nancy, France* – S. Hoffstetter.

### **Doses and schedules of the chemotherapy combinations used:**

MOPP-ABV hybrid chemotherapy includes mechlorethamine (6 mg/m<sup>2</sup> I.V., day 1), oncovin (vincristine, 1.4 mg/m<sup>2</sup> I.V. dose capped at 2 mg, day 1), procarbazine (100 mg/m<sup>2</sup> P.O., days 1-7), prednisone (40 mg/m<sup>2</sup> P.O., days 1-14), adriamycin (doxorubicin, 35 mg/m<sup>2</sup> I.V., day 8), bleomycin (10 mg/m<sup>2</sup> I.V. or I.M., day 8) and vinblastine (6 mg/m<sup>2</sup> I.V., day 8). Cycle length 28 days.
